# Supplementary material
Source: MDPI journal article supplement (https://www.mdpi.com/1424-8247/16/8/1164)
Supplement: s1 [file s1]

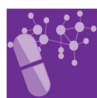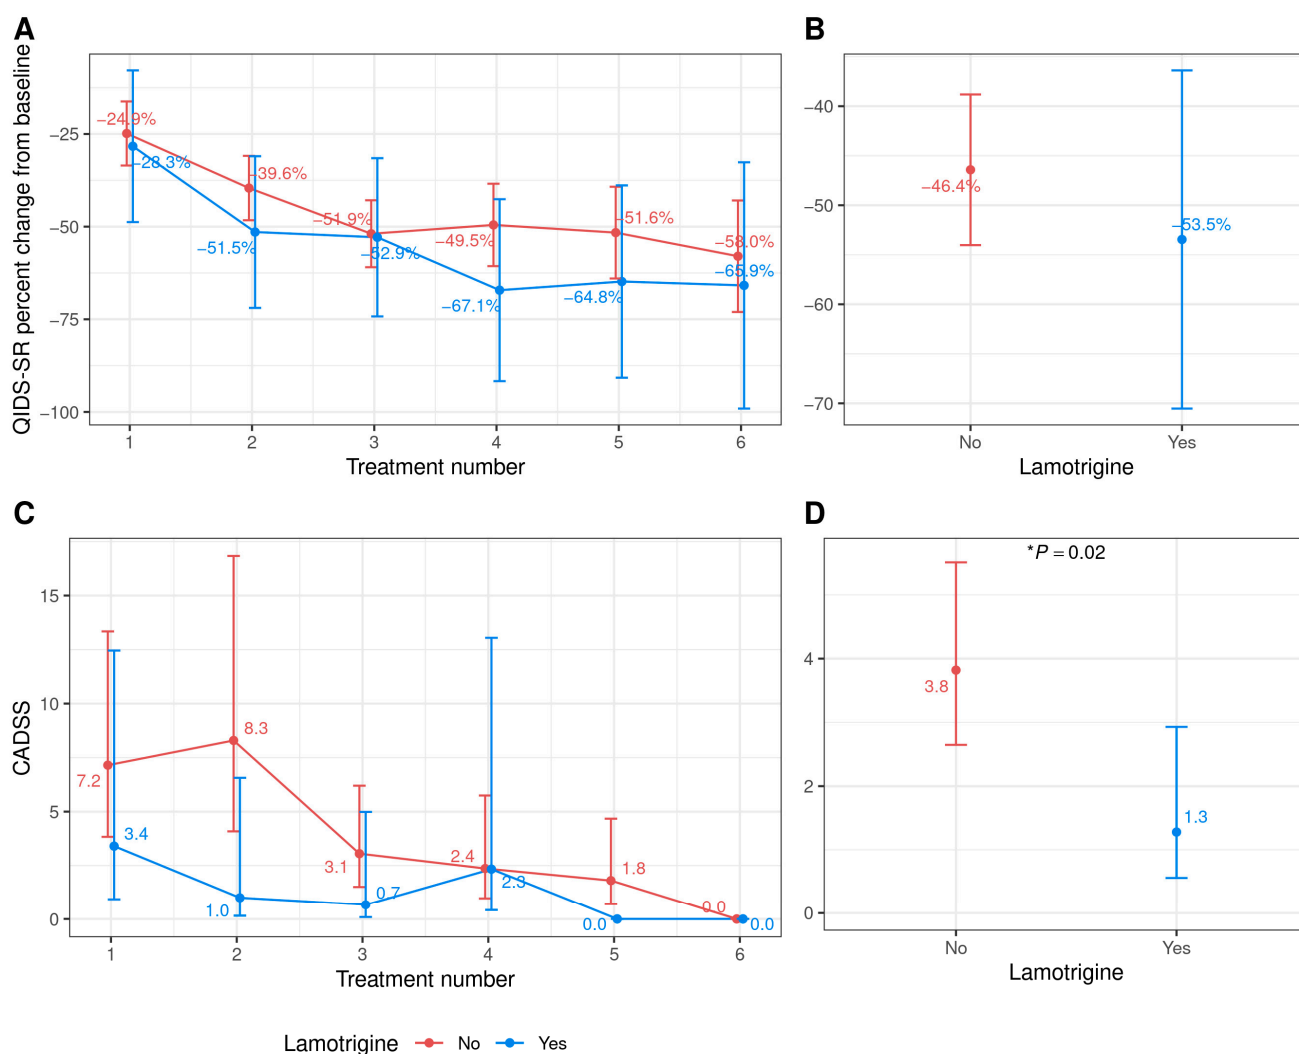

**Figure S1.** Among patients receiving IV ketamine based on lamotrigine usage: mean percent change in QIDS-SR 16 scores from baseline (A) after each treatment and (B) overall (N = 47). Mean CADSS score (C) during treatment and (D) overall (N = 36). Supplement Figure S1C: no confidence intervals reported for CADSS during treatment number 6 because no variability within either lamotrigine group.
